# Supplementary material for: Automated terrestrial laser scanning with near-real-time change detection – monitoring of the Séchilienne landslide
Source: Copernicus journal article supplement (doi:10.5194/esurf-5-293-2017), 2017-05-24
Supplement: Supplementary file [file esurf-5-293-2017-supplement-title-page.pdf › esurf-5-293-2017-supplement-title-page.pdf]

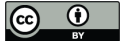

## *Supplement of*

# **Automated terrestrial laser scanning with near-real-time change detection – monitoring of the Séchilienne landslide**

**Ryan A. Kromer et al.**

*Correspondence to:* Ryan A. Kromer ([ryan.kromer@queensu.ca](mailto:ryan.kromer@queensu.ca))

- [esurf-5-293-2017-supplement-title-page.pdf](#)
- [SpaceTimeAuto\\_rgst.cpp](#)

The copyright of individual parts of the supplement might differ from the CC-BY 3.0 licence.
